# Supplementary material for: A Comprehensive Analysis of KRT19 Combined with Immune Infiltration to Predict Breast Cancer Prognosis
Source: MDPI journal article supplement (doi:10.3390/genes13101838), 2022-10-12
Supplement: s1 [file s1]

**Table S1. Correlation between KRT19 expression and clinicopathological features in BRCA.**

| Characteristic            | Low expression<br>of KRT19 | High expression<br>of KRT19 | <i>P</i>     |
|---------------------------|----------------------------|-----------------------------|--------------|
| n                         | 541                        | 542                         |              |
| T stage, n (%)            |                            |                             | 0.291        |
| T1                        | 125 (11.6%)                | 152 (14.1%)                 |              |
| T2                        | 326 (30.2%)                | 303 (28.1%)                 |              |
| T3                        | 70 (6.5%)                  | 69 (6.4%)                   |              |
| T4                        | 19 (1.8%)                  | 16 (1.5%)                   |              |
| N stage, n (%)            |                            |                             | 0.667        |
| N0                        | 267 (25.1%)                | 247 (23.2%)                 |              |
| N1                        | 171 (16.1%)                | 187 (17.6%)                 |              |
| N2                        | 57 (5.4%)                  | 59 (5.5%)                   |              |
| N3                        | 39 (3.7%)                  | 37 (3.5%)                   |              |
| M stage, n (%)            |                            |                             | 0.387        |
| M0                        | 472 (51.2%)                | 430 (46.6%)                 |              |
| M1                        | 8 (0.9%)                   | 12 (1.3%)                   |              |
| Pathologic stage, n (%)   |                            |                             | 0.132        |
| Stage I                   | 81 (7.6%)                  | 100 (9.4%)                  |              |
| Stage II                  | 325 (30.7%)                | 294 (27.7%)                 |              |
| Stage III                 | 119 (11.2%)                | 123 (11.6%)                 |              |
| Stage IV                  | 6 (0.6%)                   | 12 (1.1%)                   |              |
| Race, n (%)               |                            |                             | <b>0.027</b> |
| Asian                     | 32 (3.2%)                  | 28 (2.8%)                   |              |
| Black or African American | 76 (7.6%)                  | 105 (10.6%)                 |              |
| White                     | 399 (40.1%)                | 354 (35.6%)                 |              |
| Age, n (%)                |                            |                             | 0.519        |

|                                |             |             |                   |
|--------------------------------|-------------|-------------|-------------------|
| <=60                           | 306 (28.3%) | 295 (27.2%) |                   |
| >60                            | 235 (21.7%) | 247 (22.8%) |                   |
| Histological type, n (%)       |             |             | <b>0.090</b>      |
| Infiltrating Ductal Carcinoma  | 389 (39.8%) | 383 (39.2%) |                   |
| Infiltrating Lobular Carcinoma | 89 (9.1%)   | 116 (11.9%) |                   |
| PR status, n (%)               |             |             | <b>&lt; 0.001</b> |
| Negative                       | 223 (21.6%) | 119 (11.5%) |                   |
| Indeterminate                  | 3 (0.3%)    | 1 (0.1%)    |                   |
| Positive                       | 286 (27.7%) | 402 (38.9%) |                   |
| ER status, n (%)               |             |             | <b>&lt; 0.001</b> |
| Negative                       | 177 (17.1%) | 63 (6.1%)   |                   |
| Indeterminate                  | 1 (0.1%)    | 1 (0.1%)    |                   |
| Positive                       | 335 (32.4%) | 458 (44.3%) |                   |
| HER2 status, n (%)             |             |             | 0.939             |
| Negative                       | 300 (41.3%) | 258 (35.5%) |                   |
| Indeterminate                  | 6 (0.8%)    | 6 (0.8%)    |                   |
| Positive                       | 86 (11.8%)  | 71 (9.8%)   |                   |
| PAM50, n (%)                   |             |             | <b>&lt; 0.001</b> |
| Normal                         | 27 (2.5%)   | 13 (1.2%)   |                   |
| LumA                           | 230 (21.2%) | 332 (30.7%) |                   |
| LumB                           | 80 (7.4%)   | 124 (11.4%) |                   |
| Her2                           | 53 (4.9%)   | 29 (2.7%)   |                   |
| Basal                          | 151 (13.9%) | 44 (4.1%)   |                   |
| Menopause status, n (%)        |             |             | 0.149             |
| Pre                            | 123 (12.7%) | 106 (10.9%) |                   |
| Peri                           | 25 (2.6%)   | 15 (1.5%)   |                   |
| Post                           | 345 (35.5%) | 358 (36.8%) |                   |

|                                       |             |             |       |
|---------------------------------------|-------------|-------------|-------|
| Anatomic neoplasm subdivisions, n (%) |             |             | 0.975 |
| Left                                  | 282 (26%)   | 281 (25.9%) |       |
| Right                                 | 259 (23.9%) | 261 (24.1%) |       |
| radiation_therapy, n (%)              |             |             | 0.862 |
| No                                    | 216 (21.9%) | 218 (22.1%) |       |
| Yes                                   | 271 (27.5%) | 282 (28.6%) |       |
| OS event, n (%)                       |             |             | 0.424 |
| Alive                                 | 460 (42.5%) | 471 (43.5%) |       |
| Dead                                  | 81 (7.5%)   | 71 (6.6%)   |       |
| DSS event, n (%)                      |             |             | 0.351 |
| Alive                                 | 483 (45.4%) | 495 (46.6%) |       |
| Dead                                  | 47 (4.4%)   | 38 (3.6%)   |       |
| PFI event, n (%)                      |             |             | 0.152 |
| Alive                                 | 459 (42.4%) | 477 (44%)   |       |
| Dead                                  | 82 (7.6%)   | 65 (6%)     |       |
| Age, median (IQR)                     | 58 (48, 67) | 59 (49, 67) | 0.360 |
