# Supplementary material for: A Comprehensive Analysis of KRT19 Combined with Immune Infiltration to Predict Breast Cancer Prognosis
Source: MDPI journal article supplement (doi:10.3390/genes13101838), 2022-10-12
Supplement: s1 [file s1]

**Table S2. Correlation between KRT19 and co-expression molecules**

| <b>Target molecule</b> | <b>Other molecules</b> | <b>Correlation coefficient (Pearson)</b> | <b><i>P</i> (Pearson)</b> | <b>Correlation coefficient (Spearman)</b> | <b><i>P</i> (Spearman)</b> |
|------------------------|------------------------|------------------------------------------|---------------------------|-------------------------------------------|----------------------------|
| KRT19                  | KRT13                  | 0.140                                    | <0.001                    | 0.283                                     | <0.001                     |
| KRT19                  | FGF4                   | 0.013                                    | 0.666                     | -0.037                                    | 0.214                      |
| KRT19                  | ZFY                    | 0.078                                    | 0.010                     | 0.013                                     | 0.654                      |
| KRT19                  | FAM25A                 | 0.267                                    | <0.001                    | 0.361                                     | <0.001                     |
| KRT19                  | SPANXB1                | 0.100                                    | <0.001                    | 0.145                                     | <0.001                     |
| KRT19                  | CHGB                   | -0.075                                   | 0.012                     | -0.116                                    | <0.001                     |
| KRT19                  | SMR3A                  | -0.105                                   | <0.001                    | -0.166                                    | <0.001                     |
| KRT19                  | SMR3B                  | -0.102                                   | <0.001                    | -0.094                                    | 0.002                      |
| KRT19                  | LALBA                  | -0.093                                   | 0.002                     | -0.176                                    | <0.001                     |
| KRT19                  | CSN2                   | -0.082                                   | 0.007                     | -0.241                                    | <0.001                     |
