# Supplementary material for: A Comprehensive Analysis of KRT19 Combined with Immune Infiltration to Predict Breast Cancer Prognosis
Source: Genes (Basel). 2022 Oct 12;13(10):1838. doi: 10.3390/genes13101838 (PMC9602083; doi:10.3390/genes13101838)
Supplement: Supplementary file 1 [file genes-13-01838-s001.zip]

Archive with 8 entries (8 files):
- Figure S1.jpg
- Figure S2.jpg
- Figure S3.jpg
- Figure S4.jpg
- Figure S5.jpg
- Table S1.pdf
- Table S2.pdf
- Table S3.xlsx
