# Supplementary material for: A Comprehensive Analysis of KRT19 Combined with Immune Infiltration to Predict Breast Cancer Prognosis
Source: Genes (Basel). 2022 Oct 12;13(10):1838. doi: 10.3390/genes13101838 (PMC9602083; doi:10.3390/genes13101838)
Supplement: Supplementary file 1 [file genes-13-01838-s001.zip › Table S3.xlsx]

## Sheet: Sheet 1
Table S3. The GO results of DEGs with distinct KRT19 expression in BRCA.
ONTOLOGY	ID	Description	GeneRatio	BgRatio	pvalue	p.adjust	qvalue	geneID	Count	zscore
BP	GO:0001580	detection of chemical stimulus involved in sensory perception of bitter taste	14/513	41/18670	2.09349e-12	8.06412e-09	7.53876e-09	TAS2R42/TAS2R43/TAS2R39/TAS2R3/PIGR/RTP3/TAS2R60/LPO/TAS2R50/TAS2R40/TAS2R46/TAS2R30/TAS2R13/CA6	14	-3.74166
BP	GO:0050913	sensory perception of bitter taste	14/513	45/18670	8.96157e-12	1.726e-08	1.61355e-08	TAS2R42/TAS2R43/TAS2R39/TAS2R3/PIGR/RTP3/TAS2R60/LPO/TAS2R50/TAS2R40/TAS2R46/TAS2R30/TAS2R13/CA6	14	-3.74166
BP	GO:0050912	detection of chemical stimulus involved in sensory perception of taste	14/513	47/18670	1.74448e-11	2.23991e-08	2.09399e-08	TAS2R42/TAS2R43/TAS2R39/TAS2R3/PIGR/RTP3/TAS2R60/LPO/TAS2R50/TAS2R40/TAS2R46/TAS2R30/TAS2R13/CA6	14	-3.74166
BP	GO:0019730	antimicrobial humoral response	19/513	122/18670	9.39273e-10	9.0452e-07	8.45593e-07	CST9/AZU1/PGLYRP2/PRTN3/LCN2/CXCL10/KLK7/REG1A/PRSS3/PI3/H2BC10/DMBT1/HTN1/BPI/SEMG2/CXCL5/CHGA/SEMG1/DCD	19	-2.52357
BP	GO:0050909	sensory perception of taste	14/513	67/18670	3.01855e-09	2.32549e-06	2.17399e-06	TAS2R42/TAS2R43/TAS2R39/TAS2R3/PIGR/RTP3/TAS2R60/LPO/TAS2R50/TAS2R40/TAS2R46/TAS2R30/TAS2R13/CA6	14	-3.74166
MF	GO:0033038	bitter taste receptor activity	9/504	23/17697	6.57518e-09	4.18181e-06	3.74439e-06	TAS2R43/TAS2R39/TAS2R3/TAS2R60/TAS2R50/TAS2R40/TAS2R46/TAS2R30/TAS2R13	9	-3
MF	GO:0048018	receptor ligand activity	38/504	482/17697	1.56362e-08	4.97232e-06	4.45221e-06	FGF4/PYY/TRH/STC2/GHRH/APOA1/IL17A/INSL4/BMP3/NRG3/IL36B/CXCL10/OSTN/IFNG/FGF9/FGF21/TAFA4/ANGPTL3/REG1A/GDF5/ADCYAP1/IL26/CCL20/EPHA7/MIA/CSH2/IL21/SPX/CMTM5/CARTPT/INSL6/CXCL5/FAM3D/AMELX/TAFA3/IFNK/LACRT/CHGB	38	-4.21776
MF	GO:0008527	taste receptor activity	9/504	29/17697	6.91842e-08	1.46671e-05	1.31329e-05	TAS2R43/TAS2R39/TAS2R3/TAS2R60/TAS2R50/TAS2R40/TAS2R46/TAS2R30/TAS2R13	9	-3
KEGG	hsa04742	Taste transduction	14/223	86/8076	7.77329e-08	1.8345e-05	1.79195e-05	ADCY8/TAS2R42/TAS2R43/TAS2R39/TAS2R3/TAS2R60/TAS2R50/TAS2R40/CHRM3/TAS2R46/GABBR2/TAS2R30/TAS2R13/GABRA5	14	-3.74166
KEGG	hsa04080	Neuroactive ligand-receptor interaction	28/223	341/8076	1.90212e-07	2.2445e-05	2.19244e-05	CHRNA9/PYY/TRH/PTH2/GHRH/GLRA3/GABRP/HTR6/GLRA2/GABRG2/CRHR1/TRHR/GRIN2B/PRSS3/PTGFR/ADCYAP1/GABRG3/CHRND/HCRTR2/GLRA1/CSH2/AVPR1B/NPY4R/OPRK1/CHRM3/CCKBR/GABBR2/GABRA5	28	-3.02372
MF	GO:0022838	substrate-specific channel activity	31/504	428/17697	2.08218e-06	0.000331066	0.000296436	CHRNA9/KCNF1/CACNG6/CACNG1/KCNK16/GLRA3/KCNK15/CACNA1H/GABRP/GLRA2/GABRG2/GRIN2B/TRPM6/KCNS1/CACNG5/GABRG3/CLCA2/KCNJ16/CHRND/KCNA2/TRPM8/GLRA1/TTYH1/AQP5/KCNH5/KCNV1/TRPC5/OTOP1/SLC26A9/UNC80/GABRA5	31	-2.69408
MF	GO:0005237	inhibitory extracellular ligand-gated ion channel activity	6/504	16/17697	3.25282e-06	0.000352269	0.000315421	GLRA3/GLRA2/GABRG2/GABRG3/GLRA1/GABRA5	6	-1.63299
MF	GO:0005216	ion channel activity	30/504	416/17697	3.32329e-06	0.000352269	0.000315421	CHRNA9/KCNF1/CACNG6/CACNG1/KCNK16/GLRA3/KCNK15/CACNA1H/GABRP/GLRA2/GABRG2/GRIN2B/TRPM6/KCNS1/CACNG5/GABRG3/CLCA2/KCNJ16/CHRND/KCNA2/TRPM8/GLRA1/TTYH1/KCNH5/KCNV1/TRPC5/OTOP1/SLC26A9/UNC80/GABRA5	30	-2.55604
BP	GO:0007218	neuropeptide signaling pathway	14/513	104/18670	9.67534e-07	0.000621157	0.00058069	PYY/PTH2/GPR139/GLRA3/GLRA2/CRHR1/ADCYAP1/PROKR1/HCRTR2/GLRA1/QRFPR/CARTPT/OPRK1/PROKR2	14	-1.60357
MF	GO:0015267	channel activity	31/504	456/17697	7.59208e-06	0.000630589	0.000564628	CHRNA9/KCNF1/CACNG6/CACNG1/KCNK16/GLRA3/KCNK15/CACNA1H/GABRP/GLRA2/GABRG2/GRIN2B/TRPM6/KCNS1/CACNG5/GABRG3/CLCA2/KCNJ16/CHRND/KCNA2/TRPM8/GLRA1/TTYH1/AQP5/KCNH5/KCNV1/TRPC5/OTOP1/SLC26A9/UNC80/GABRA5	31	-2.69408
MF	GO:0022803	passive transmembrane transporter activity	31/504	457/17697	7.93193e-06	0.000630589	0.000564628	CHRNA9/KCNF1/CACNG6/CACNG1/KCNK16/GLRA3/KCNK15/CACNA1H/GABRP/GLRA2/GABRG2/GRIN2B/TRPM6/KCNS1/CACNG5/GABRG3/CLCA2/KCNJ16/CHRND/KCNA2/TRPM8/GLRA1/TTYH1/AQP5/KCNH5/KCNV1/TRPC5/OTOP1/SLC26A9/UNC80/GABRA5	31	-2.69408
MF	GO:0099095	ligand-gated anion channel activity	6/504	20/17697	1.42865e-05	0.00100958	0.000903977	GLRA3/GLRA2/GABRG2/GABRG3/GLRA1/GABRA5	6	-1.63299
BP	GO:0006959	humoral immune response	27/513	356/18670	2.12276e-06	0.00116812	0.00109202	KRT1/CST9/AZU1/PGLYRP2/PRTN3/FCER2/LCN2/CXCL10/KLK7/IFNG/REG1A/C4BPA/PRSS3/MS4A1/PI3/H2BC10/CR2/DMBT1/HTN1/ZP4/BPI/SEMG2/CXCL5/CHGA/SEMG1/DCD/IFNK	27	-3.27165
MF	GO:0030414	peptidase inhibitor activity	17/504	182/17697	1.84156e-05	0.00117123	0.00104872	CST9/CST9L/CST11/WFDC10A/WFDC10B/WFDC8/SERPIND1/SERPINB11/HMSD/PI3/SERPINB12/SERPINB7/PZP/A2ML1/SMR3A/SMR3B/CSN2	17	-1.69775
MF	GO:0046873	metal ion transmembrane transporter activity	29/504	438/17697	2.43784e-05	0.00140952	0.00126208	CHRNA9/KCNF1/CACNG6/CACNG1/KCNK16/KCNK15/SLC4A10/CACNA1H/SLC9A4/SLC17A4/GRIN2B/TRPM6/KCNS1/CACNG5/SLC6A2/ATP2B3/SLC30A10/KCNJ16/KCNA2/TRPM8/TTYH1/NIPAL4/SLC12A1/KCNH5/KCNV1/SLC6A15/TRPC5/SLC6A14/SLC39A12	29	-2.41404
MF	GO:0015108	chloride transmembrane transporter activity	12/504	100/17697	2.69843e-05	0.00143017	0.00128057	GLRA3/GABRP/GLRA2/GABRG2/SLC6A2/GABRG3/CLCA2/GLRA1/TTYH1/SLC12A1/SLC26A9/GABRA5	12	-2.88675
MF	GO:0004866	endopeptidase inhibitor activity	16/504	175/17697	4.1932e-05	0.00199473	0.00178608	CST9/CST9L/CST11/WFDC10A/WFDC8/SERPIND1/SERPINB11/HMSD/PI3/SERPINB12/SERPINB7/PZP/A2ML1/SMR3A/SMR3B/CSN2	16	-2
MF	GO:0005230	extracellular ligand-gated ion channel activity	10/504	75/17697	5.06085e-05	0.00199473	0.00178608	CHRNA9/GLRA3/GABRP/GLRA2/GABRG2/GRIN2B/GABRG3/CHRND/GLRA1/GABRA5	10	-1.89737
MF	GO:0005254	chloride channel activity	10/504	75/17697	5.06085e-05	0.00199473	0.00178608	GLRA3/GABRP/GLRA2/GABRG2/GABRG3/CLCA2/GLRA1/TTYH1/SLC26A9/GABRA5	10	-2.52982
MF	GO:0022824	transmitter-gated ion channel activity	9/504	61/17697	5.33183e-05	0.00199473	0.00178608	CHRNA9/GLRA3/GLRA2/GABRG2/GRIN2B/GABRG3/CHRND/GLRA1/GABRA5	9	-1.66667
MF	GO:0022835	transmitter-gated channel activity	9/504	61/17697	5.33183e-05	0.00199473	0.00178608	CHRNA9/GLRA3/GLRA2/GABRG2/GRIN2B/GABRG3/CHRND/GLRA1/GABRA5	9	-1.66667
MF	GO:0061135	endopeptidase regulator activity	16/504	182/17697	6.73118e-05	0.00237835	0.00212957	CST9/CST9L/CST11/WFDC10A/WFDC8/SERPIND1/SERPINB11/HMSD/PI3/SERPINB12/SERPINB7/PZP/A2ML1/SMR3A/SMR3B/CSN2	16	-2
MF	GO:0022839	ion gated channel activity	23/504	334/17697	9.33176e-05	0.00312368	0.00279694	CHRNA9/KCNF1/CACNG6/CACNG1/KCNK16/GLRA3/CACNA1H/GABRP/GLRA2/GABRG2/GRIN2B/KCNS1/CACNG5/GABRG3/CLCA2/KCNJ16/CHRND/KCNA2/GLRA1/TTYH1/KCNH5/KCNV1/GABRA5	23	-1.87663
CC	GO:0034702	ion channel complex	23/542	301/19717	1.08504e-05	0.00364574	0.00327797	CHRNA9/KCNF1/CACNG6/CACNG1/GLRA3/CACNA1H/GABRP/GLRA2/GABRG2/GRIN2B/KCNS1/CACNG5/GABRG3/KCNJ16/CHRND/KCNA2/GLRA1/TTYH1/KCNV1/TRPC5/UNC80/GABRA5/OLFM3	23	-2.29366
CC	GO:1902495	transmembrane transporter complex	23/542	324/19717	3.49771e-05	0.00373184	0.00335538	CHRNA9/KCNF1/CACNG6/CACNG1/GLRA3/CACNA1H/GABRP/GLRA2/GABRG2/GRIN2B/KCNS1/CACNG5/GABRG3/KCNJ16/CHRND/KCNA2/GLRA1/TTYH1/KCNV1/TRPC5/UNC80/GABRA5/OLFM3	23	-2.29366
CC	GO:0000786	nucleosome	12/542	107/19717	3.81129e-05	0.00373184	0.00335538	IRF4/H4C2/H2BC14/H2BC10/H4C1/H2AC12/H4C3/H3C11/H2BC3/H4C6/H4C13/H1-1	12	-3.4641
CC	GO:1990351	transporter complex	23/542	332/19717	5.09989e-05	0.00373184	0.00335538	CHRNA9/KCNF1/CACNG6/CACNG1/GLRA3/CACNA1H/GABRP/GLRA2/GABRG2/GRIN2B/KCNS1/CACNG5/GABRG3/KCNJ16/CHRND/KCNA2/GLRA1/TTYH1/KCNV1/TRPC5/UNC80/GABRA5/OLFM3	23	-2.29366
CC	GO:0034707	chloride channel complex	8/542	50/19717	6.01365e-05	0.00373184	0.00335538	GLRA3/GABRP/GLRA2/GABRG2/GABRG3/GLRA1/TTYH1/GABRA5	8	-2.12132
CC	GO:0000788	nuclear nucleosome	7/542	38/19717	6.86892e-05	0.00373184	0.00335538	IRF4/H4C2/H4C1/H4C3/H3C11/H4C6/H4C13	7	-2.64575
CC	GO:0044815	DNA packaging complex	12/542	115/19717	7.77467e-05	0.00373184	0.00335538	IRF4/H4C2/H2BC14/H2BC10/H4C1/H2AC12/H4C3/H3C11/H2BC3/H4C6/H4C13/H1-1	12	-3.4641
MF	GO:0030594	neurotransmitter receptor activity	12/504	117/17697	0.000127246	0.00404642	0.00362316	CHRNA9/GLRA3/HTR6/GLRA2/GABRG2/GRIN2B/GABRG3/CHRND/GLRA1/CHRM3/GABBR2/GABRA5	12	-2.3094
MF	GO:0022836	gated channel activity	23/504	343/17697	0.000138609	0.00419787	0.00375877	CHRNA9/KCNF1/CACNG6/CACNG1/KCNK16/GLRA3/CACNA1H/GABRP/GLRA2/GABRG2/GRIN2B/KCNS1/CACNG5/GABRG3/CLCA2/KCNJ16/CHRND/KCNA2/GLRA1/TTYH1/KCNH5/KCNV1/GABRA5	23	-1.87663
MF	GO:0061134	peptidase regulator activity	17/504	219/17697	0.000186372	0.00524264	0.00469426	CST9/CST9L/CST11/WFDC10A/WFDC10B/WFDC8/SERPIND1/SERPINB11/HMSD/PI3/SERPINB12/SERPINB7/PZP/A2ML1/SMR3A/SMR3B/CSN2	17	-1.69775
MF	GO:0005179	hormone activity	12/504	122/17697	0.000189592	0.00524264	0.00469426	PYY/TRH/STC2/GHRH/INSL4/OSTN/ADCYAP1/CSH2/SPX/CARTPT/INSL6/CHGB	12	-1.1547
MF	GO:0005253	anion channel activity	10/504	89/17697	0.000217706	0.00576921	0.00516575	GLRA3/GABRP/GLRA2/GABRG2/GABRG3/CLCA2/GLRA1/TTYH1/SLC26A9/GABRA5	10	-2.52982
CC	GO:1902710	GABA receptor complex	5/542	20/19717	0.000169629	0.0071244	0.00640571	GABRP/GABRG2/GABRG3/GABBR2/GABRA5	5	-2.23607
MF	GO:0015103	inorganic anion transmembrane transporter activity	13/504	146/17697	0.000280755	0.0071424	0.0063953	GLRA3/SLC4A10/GABRP/GLRA2/GABRG2/SLC6A2/GABRG3/CLCA2/GLRA1/TTYH1/SLC12A1/SLC26A9/GABRA5	13	-2.49615
MF	GO:0016917	GABA receptor activity	5/504	22/17697	0.000323672	0.00775807	0.00694656	GABRP/GABRG2/GABRG3/GABBR2/GABRA5	5	-2.23607
MF	GO:0004867	serine-type endopeptidase inhibitor activity	10/504	94/17697	0.000341107	0.00775807	0.00694656	WFDC10A/WFDC8/SERPIND1/SERPINB11/HMSD/PI3/SERPINB12/SERPINB7/PZP/A2ML1	10	-2.52982
MF	GO:1904315	transmitter-gated ion channel activity involved in regulation of postsynaptic membrane potential	7/504	47/17697	0.00034155	0.00775807	0.00694656	CHRNA9/GLRA2/GABRG2/GABRG3/CHRND/GLRA1/GABRA5	7	-1.88982
MF	GO:0001653	peptide receptor activity	13/504	152/17697	0.000415401	0.00911017	0.00815723	GPR139/RAMP1/GPR37L1/LGR5/CRHR1/CXCR5/PROKR1/HCRTR2/AVPR1B/QRFPR/OPRK1/CCKBR/PROKR2	13	-1.94145
MF	GO:0099529	neurotransmitter receptor activity involved in regulation of postsynaptic membrane potential	7/504	50/17697	0.000504028	0.0106854	0.00956768	CHRNA9/GLRA2/GABRG2/GABRG3/CHRND/GLRA1/GABRA5	7	-1.88982
CC	GO:0099699	integral component of synaptic membrane	13/542	152/19717	0.000298882	0.0111583	0.0100327	CHRNA9/ADCY8/CACNG5/GABRG3/NRXN1/CHRND/KCNA2/EPHA7/GLRA1/OPRK1/CHRM3/LRRTM3/GABRA5	13	-3.05085
MF	GO:0015276	ligand-gated ion channel activity	12/504	138/17697	0.000590617	0.0117385	0.0105106	CHRNA9/GLRA3/GABRP/GLRA2/GABRG2/GRIN2B/GABRG3/CLCA2/KCNJ16/CHRND/GLRA1/GABRA5	12	-2.3094
MF	GO:0022834	ligand-gated channel activity	12/504	138/17697	0.000590617	0.0117385	0.0105106	CHRNA9/GLRA3/GABRP/GLRA2/GABRG2/GRIN2B/GABRG3/CLCA2/KCNJ16/CHRND/GLRA1/GABRA5	12	-2.3094
MF	GO:0098960	postsynaptic neurotransmitter receptor activity	7/504	52/17697	0.000642859	0.0123897	0.0110937	CHRNA9/GLRA2/GABRG2/GABRG3/CHRND/GLRA1/GABRA5	7	-1.88982
MF	GO:0016594	glycine binding	4/504	15/17697	0.000691025	0.0125569	0.0112434	GLRA3/GLRA2/GRIN2B/GLRA1	4	-1
MF	GO:0019841	retinol binding	4/504	15/17697	0.000691025	0.0125569	0.0112434	ADH7/CYP27C1/ADH4/RLBP1	4	-1
CC	GO:0097060	synaptic membrane	25/542	432/19717	0.00041124	0.0138177	0.0124238	CHRNA9/GLRA3/RIMS4/GABRP/ADCY8/GLRA2/GABRG2/GRIN2B/STX19/SHC4/CACNG5/SLC6A2/GABRG3/NRXN1/CHRND/KCNA2/MUSK/EPHA7/GLRA1/LHFPL4/OPRK1/CHRM3/GABBR2/LRRTM3/GABRA5	25	-3.8
BP	GO:1902476	chloride transmembrane transport	11/513	88/18670	2.87024e-05	0.0138202	0.0129199	GLRA3/GABRP/GLRA2/GABRG2/GABRG3/CLCA2/GLRA1/TTYH1/SLC12A1/SLC26A9/GABRA5	11	-2.7136
MF	GO:0001228	DNA-binding transcription activator activity, RNA polymerase II-specific	25/504	439/17697	0.000848749	0.0147778	0.013232	MSGN1/SPIC/IRF4/ZIC1/ELF5/FOXC1/ST18/HOXD13/LHX3/SOX11/DLX5/TBX10/DMRT1/PHOX2B/SPIB/NR2E1/BARHL2/POU4F1/FEZF2/POU3F2/SIX3/RFX4/TLX1/NR1H4/SOX8	25	-5
MF	GO:0005261	cation channel activity	20/504	319/17697	0.000865867	0.0147778	0.013232	CHRNA9/KCNF1/CACNG6/CACNG1/KCNK16/KCNK15/CACNA1H/GRIN2B/TRPM6/KCNS1/CACNG5/KCNJ16/CHRND/KCNA2/TRPM8/KCNH5/KCNV1/TRPC5/OTOP1/UNC80	20	-1.34164
MF	GO:0016918	retinal binding	4/504	16/17697	0.000900752	0.0147778	0.013232	OPN5/CYP27C1/ADH4/RLBP1	4	-2
MF	GO:0042165	neurotransmitter binding	7/504	55/17697	0.000906185	0.0147778	0.013232	GLRA3/GLRA2/CRHR1/GRIN2B/CHRND/GLRA1/CHRM3	7	-1.88982
MF	GO:0008528	G protein-coupled peptide receptor activity	12/504	146/17697	0.0009736	0.0154802	0.013861	GPR139/RAMP1/GPR37L1/LGR5/CXCR5/PROKR1/HCRTR2/AVPR1B/QRFPR/OPRK1/CCKBR/PROKR2	12	-1.73205
MF	GO:0005184	neuropeptide hormone activity	5/504	28/17697	0.0010493	0.0162769	0.0145743	PYY/GHRH/ADCYAP1/SPX/CARTPT	5	-0.447214
MF	GO:0008509	anion transmembrane transporter activity	20/504	327/17697	0.00117082	0.0177296	0.0158751	GLRA3/SLC4A10/GABRP/GLRA2/GABRG2/SLC17A4/SLC6A2/SLC2A2/GABRG3/CLCA2/SLC17A6/SLCO5A1/GLRA1/TTYH1/SLC12A1/OCA2/SLC6A15/SLC6A14/SLC26A9/GABRA5	20	-3.57771
BP	GO:0006821	chloride transport	12/513	108/18670	4.14845e-05	0.0177554	0.0165986	GLRA3/SLC4A10/GABRP/GLRA2/GABRG2/GABRG3/CLCA2/GLRA1/TTYH1/SLC12A1/SLC26A9/GABRA5	12	-2.3094
CC	GO:0099240	intrinsic component of synaptic membrane	13/542	164/19717	0.000620118	0.0185459	0.016675	CHRNA9/ADCY8/CACNG5/GABRG3/NRXN1/CHRND/KCNA2/EPHA7/GLRA1/OPRK1/CHRM3/LRRTM3/GABRA5	13	-3.05085
CC	GO:0045211	postsynaptic membrane	20/542	323/19717	0.000662352	0.0185459	0.016675	CHRNA9/GLRA3/GABRP/ADCY8/GLRA2/GABRG2/GRIN2B/SHC4/CACNG5/GABRG3/CHRND/MUSK/EPHA7/GLRA1/LHFPL4/OPRK1/CHRM3/GABBR2/LRRTM3/GABRA5	20	-3.57771
CC	GO:0032809	neuronal cell body membrane	5/542	27/19717	0.000753536	0.019476	0.0175113	ADCY8/SLC6A2/REG1A/KCNA2/GABRA5	5	-2.23607
BP	GO:0030900	forebrain development	25/513	381/18670	5.80826e-05	0.0208384	0.0194808	ASCL1/GHRH/SLC4A10/KIRREL3/HTR6/NRG3/CRHR1/SLITRK5/CRTAC1/BCL2A1/ALK/LHX3/ADCYAP1/DMRTA2/DLX5/PTCHD1/NKX2-1/NR2E1/POU4F1/FEZF2/POU3F2/SIX3/PPARGC1A/RFX4/FABP7	25	-3.8
BP	GO:0070268	cornification	12/513	112/18670	5.95073e-05	0.0208384	0.0194808	KRT13/KRT1/KRT37/KRT31/KRT35/KRT32/KRT33A/DSG3/LCE3D/PI3/KRT79/DSG1	12	0.57735
CC	GO:0044298	cell body membrane	5/542	28/19717	0.000896823	0.0215237	0.0193525	ADCY8/SLC6A2/REG1A/KCNA2/GABRA5	5	-2.23607
BP	GO:0048663	neuron fate commitment	9/513	65/18670	6.77445e-05	0.021746	0.0203293	ASCL1/LHX3/DMRTA2/NKX2-1/POU4F1/FEZF2/POU3F2/PAX7/TLX3	9	-2.33333
MF	GO:0005231	excitatory extracellular ligand-gated ion channel activity	5/504	31/17697	0.00169114	0.0250131	0.0223967	CHRNA9/GLRA3/GLRA2/CHRND/GLRA1	5	-0.447214
MF	GO:0004890	GABA-A receptor activity	4/504	19/17697	0.00179265	0.0259119	0.0232015	GABRP/GABRG2/GABRG3/GABRA5	4	-2
KEGG	hsa05322	Systemic lupus erythematosus	12/223	136/8076	0.000362394	0.0285083	0.0278471	GRIN2B/IFNG/H4C2/H2BC14/H2BC10/H4C1/H2AC12/H4C3/H3C11/H2BC3/H4C6/H4C13	12	-3.4641
BP	GO:0045653	negative regulation of megakaryocyte differentiation	5/513	18/18670	9.78264e-05	0.0289619	0.0270751	H4C2/H4C1/H4C3/H4C6/H4C13	5	-2.23607
BP	GO:0051290	protein heterotetramerization	8/513	54/18670	0.000105326	0.0289619	0.0270751	KRT1/GRIN2B/H4C2/H4C1/H4C3/H3C11/H4C6/H4C13	8	-2.12132
BP	GO:0001764	neuron migration	14/513	157/18670	0.00011278	0.0289619	0.0270751	ASCL1/KIRREL3/NRG3/NKX2-1/PHOX2B/VAX1/BARHL2/FEZF2/UNC5D/DNER/TLX3/GFRA3/SOX14/SCRT2	14	-3.20713
MF	GO:0004983	neuropeptide Y receptor activity	3/504	10/17697	0.00237292	0.0335373	0.0300293	PROKR1/QRFPR/PROKR2	3	-1.73205
MF	GO:0008083	growth factor activity	12/504	163/17697	0.0024893	0.0338581	0.0303165	FGF4/BMP3/NRG3/FGF9/FGF21/ANGPTL3/REG1A/GDF5/MIA/CSH2/AMELX/LACRT	12	-2.88675
MF	GO:0022843	voltage-gated cation channel activity	11/504	142/17697	0.00250209	0.0338581	0.0303165	KCNF1/CACNG6/CACNG1/CACNA1H/GRIN2B/KCNS1/CACNG5/KCNJ16/KCNA2/KCNH5/KCNV1	11	-0.904534
MF	GO:0004857	enzyme inhibitor activity	21/504	375/17697	0.00262017	0.0347173	0.0310858	APOC3/CST9/CST9L/APOA1/CST11/WFDC10A/WFDC10B/WFDC8/SERPIND1/ANGPTL3/SERPINB11/HMSD/PI3/SERPINB12/SERPINB7/PZP/A2ML1/PPP1R17/SMR3A/SMR3B/CSN2	21	-1.52753
CC	GO:1902711	GABA-A receptor complex	4/542	19/19717	0.00157561	0.0352937	0.0317334	GABRP/GABRG2/GABRG3/GABRA5	4	-2
CC	GO:0000790	nuclear chromatin	21/542	377/19717	0.00185499	0.0368286	0.0331134	EN2/IRF4/FOXC1/H4C2/ZFP42/EN1/DLX5/PHOX2B/POU4F1/H4C1/H2AC12/H4C3/H3C11/PPARGC1A/H4C6/NR1H4/SCRT2/ACTL6B/H4C13/UBE2U/H1-1	21	-4.58258
CC	GO:0099634	postsynaptic specialization membrane	9/542	101/19717	0.00186335	0.0368286	0.0331134	CHRNA9/GRIN2B/CACNG5/CHRND/EPHA7/GLRA1/CHRM3/LRRTM3/GABRA5	9	-2.33333
MF	GO:0005501	retinoid binding	5/504	35/17697	0.00294321	0.0382016	0.0342057	ADH7/OPN5/CYP27C1/ADH4/RLBP1	5	-1.34164
BP	GO:0030534	adult behavior	13/513	144/18670	0.00017371	0.0402232	0.0376028	TRH/ZIC1/GABRG2/CRHR1/SLITRK5/EN1/ALK/NRXN1/FOXA2/SEZ6/GLRA1/CARTPT/OPRK1	13	-3.05085
BP	GO:0042475	odontogenesis of dentin-containing tooth	10/513	90/18670	0.000179541	0.0402232	0.0376028	FGF4/AMTN/FOXC1/RSPO2/EDAR/MMP20/ODAM/SOSTDC1/DSPP/AMELX	10	-2.52982
BP	GO:0006335	DNA replication-dependent nucleosome assembly	6/513	32/18670	0.000206166	0.0402232	0.0376028	H4C2/H4C1/H4C3/H3C11/H4C6/H4C13	6	-2.44949
BP	GO:0034723	DNA replication-dependent nucleosome organization	6/513	32/18670	0.000206166	0.0402232	0.0376028	H4C2/H4C1/H4C3/H3C11/H4C6/H4C13	6	-2.44949
BP	GO:0021536	diencephalon development	9/513	75/18670	0.000208843	0.0402232	0.0376028	GHRH/CRHR1/LHX3/ADCYAP1/PTCHD1/NKX2-1/POU4F1/POU3F2/SIX3	9	-2.33333
MF	GO:0008503	benzodiazepine receptor activity	3/504	11/17697	0.00319417	0.0406299	0.0363799	GABRG2/GABRG3/GABRA5	3	-1.73205
MF	GO:0019840	isoprenoid binding	5/504	36/17697	0.00333925	0.0416424	0.0372865	ADH7/OPN5/CYP27C1/ADH4/RLBP1	5	-1.34164
KEGG	hsa05033	Nicotine addiction	6/223	40/8076	0.000724756	0.0427606	0.0417688	GABRP/GABRG2/GRIN2B/GABRG3/SLC17A6/GABRA5	6	-2.44949
KEGG	hsa04970	Salivary secretion	9/223	93/8076	0.00101995	0.0433228	0.042318	ADCY8/ATP2B3/LPO/AQP5/DMBT1/HTN1/CHRM3/PRB1/PRB2	9	-3
KEGG	hsa04657	IL-17 signaling pathway	9/223	94/8076	0.00110143	0.0433228	0.042318	IL17A/LCN2/S100A7A/CXCL10/IFNG/CCL20/MUC5AC/MAPK4/CXCL5	9	-3
BP	GO:0098661	inorganic anion transmembrane transport	11/513	111/18670	0.000240912	0.0441901	0.0413113	GLRA3/GABRP/GLRA2/GABRG2/GABRG3/CLCA2/GLRA1/TTYH1/SLC12A1/SLC26A9/GABRA5	11	-2.7136
BP	GO:0031640	killing of cells of other organism	8/513	62/18670	0.000282499	0.0452606	0.042312	AZU1/CST11/FCER2/IFNG/HTN1/CHGA/SEMG1/DCD	8	-1.41421
BP	GO:0044364	disruption of cells of other organism	8/513	62/18670	0.000282499	0.0452606	0.042312	AZU1/CST11/FCER2/IFNG/HTN1/CHGA/SEMG1/DCD	8	-1.41421
BP	GO:0048665	neuron fate specification	6/513	34/18670	0.000292071	0.0452606	0.042312	ASCL1/LHX3/DMRTA2/POU4F1/POU3F2/TLX3	6	-1.63299
BP	GO:0051262	protein tetramerization	14/513	172/18670	0.000293747	0.0452606	0.042312	KRT1/GRIN2B/TRPM6/H4C2/REG1A/MS4A1/TRPM8/AQP5/H4C1/H4C3/H3C11/SYCP1/H4C6/H4C13	14	-3.20713
BP	GO:0019433	triglyceride catabolic process	6/513	35/18670	0.000344403	0.050293	0.0470166	APOC3/PLIN5/APOA1/FABP12/FGF21/FABP7	6	0
BP	GO:0046503	glycerolipid catabolic process	8/513	64/18670	0.000352521	0.050293	0.0470166	APOC3/GDPD3/PLIN5/APOA1/FABP12/FGF21/PLA2G4A/FABP7	8	0
BP	GO:0022412	cellular process involved in reproduction in multicellular organism	22/513	357/18670	0.000382556	0.0520974	0.0487034	SPANXB1/TEX19/BTBD18/ASZ1/GALNTL5/EQTN/FOXC1/LGR5/ROPN1/PTX3/STRA8/SFRP1/DMRT1/DAZL/ROPN1B/OCA2/ADAD1/SYCP1/HORMAD1/TEX15/SEMG2/SEMG1	22	-3.83761
BP	GO:0007626	locomotory behavior	15/513	198/18670	0.000392218	0.0520974	0.0487034	TRH/SLC4A10/ZIC1/ADCY8/CRHR1/EN1/ALK/IDO1/FOXA2/NKX2-1/SEZ6/GLRA1/FEZF2/OPRK1/GPR52	15	-2.84019
CC	GO:0043025	neuronal cell body	25/542	497/19717	0.00288462	0.0538463	0.0484144	ASCL1/PCP2/GHRH/GLRA3/SLC4A10/S100B/ADCY8/CRHR1/SLC6A2/REG1A/ADCYAP1/NRXN1/KCNA2/EPHA7/SEZ6/GLRA1/DDC/TRPC5/OPRK1/DNER/PPARGC1A/NRSN1/FABP7/SYT4/GABRA5	25	-3
BP	GO:0097154	GABAergic neuron differentiation	4/513	14/18670	0.000452872	0.0538743	0.0503645	ASCL1/NKX2-1/HELT/FEZF2	4	-1
BP	GO:0007586	digestion	12/513	139/18670	0.00046067	0.0538743	0.0503645	APOA1/SLC9A4/PRSS3/SLC2A2/CYP39A1/LCT/AQP5/GCNT3/OPRK1/CHRM3/PPARGC1A/CCKBR	12	-2.88675
BP	GO:0007631	feeding behavior	10/513	101/18670	0.000461094	0.0538743	0.0503645	PYY/TRH/CRHR1/EN1/ACE2/HELT/HCRTR2/POU4F1/CARTPT/OPRK1	10	-1.89737
BP	GO:0071542	dopaminergic neuron differentiation	6/513	37/18670	0.000470891	0.0538743	0.0503645	EN1/RSPO2/DMRTA2/FOXA2/SFRP1/PHOX2B	6	-2.44949
BP	GO:0060078	regulation of postsynaptic membrane potential	12/513	140/18670	0.00049159	0.0538743	0.0503645	CHRNA9/GLRA3/GLRA2/GABRG2/GRIN2B/ADCYAP1/GABRG3/NRXN1/CHRND/SEZ6/GLRA1/GABRA5	12	-2.3094
BP	GO:0015837	amine transport	10/513	102/18670	0.000498913	0.0538743	0.0503645	TRH/CRHR1/ACE2/RHCG/KCNA2/DDC/CARTPT/OPRK1/CHGA/SYT4	10	-2.52982
BP	GO:0045165	cell fate commitment	18/513	270/18670	0.000510502	0.0538743	0.0503645	ASCL1/IRF4/ELF5/LHX3/DMRTA2/TBX10/FOXA2/NKX2-1/SFRP1/NR2E1/SOSTDC1/BARHL2/POU4F1/FEZF2/POU3F2/PAX7/TLX3/SOX8	18	-3.77124
BP	GO:0007214	gamma-aminobutyric acid signaling pathway	5/513	25/18670	0.000517484	0.0538743	0.0503645	GABRG2/GABRG3/PHF24/GABBR2/GABRA5	5	-2.23607
BP	GO:0035914	skeletal muscle cell differentiation	8/513	68/18670	0.000535009	0.054233	0.0506999	S100B/EPHB1/SOX11/DMRTA2/PHOX2B/VAX1/PAX7/SOX8	8	-2.82843
BP	GO:0021953	central nervous system neuron differentiation	14/513	183/18670	0.000550361	0.0543587	0.0508174	ASCL1/SLC4A10/MDGA2/EPHB1/LHX3/DLX5/NKX2-1/SFRP1/PHOX2B/NR2E1/POU4F1/FEZF2/UNC5D/PAX7	14	-2.67261
MF	GO:0022851	GABA-gated chloride ion channel activity	3/504	13/17697	0.00530671	0.0649051	0.058116	GABRG2/GABRG3/GABRA5	3	-1.73205
BP	GO:2000177	regulation of neural precursor cell proliferation	9/513	88/18670	0.000693858	0.0654743	0.0612088	ASCL1/GPR37L1/PTPRZ1/ADCYAP1/DMRTA2/VAX1/NR2E1/FZD9/SIX3	9	-1.66667
BP	GO:0042445	hormone metabolic process	16/513	232/18670	0.000715286	0.0654743	0.0612088	DHRS2/ADH7/STC2/APOA1/CHST8/CACNA1H/AKR1B15/RPE65/CHST9/IFNG/CYP27C1/KLK6/ACE2/ADH4/PPARGC1A/UGT2B7	16	-1
BP	GO:0000183	chromatin silencing at rDNA	6/513	40/18670	0.000725228	0.0654743	0.0612088	H4C2/H4C1/H4C3/H3C11/H4C6/H4C13	6	-2.44949
BP	GO:0061351	neural precursor cell proliferation	12/513	147/18670	0.000760864	0.0654743	0.0612088	ASCL1/GPR37L1/EPHB1/PTPRZ1/ADCYAP1/DMRTA2/VAX1/NR2E1/FZD9/POU3F2/SIX3/FABP7	12	-2.3094
BP	GO:0050907	detection of chemical stimulus involved in sensory perception	26/513	477/18670	0.000764473	0.0654743	0.0612088	OR13G1/OR52D1/OR6V1/TAS2R42/OR10Q1/OR14A16/TAS2R43/TAS2R39/TAS2R3/OR1L4/PIGR/OR14A2/RTP3/TAS2R60/LPO/OR13D1/OR52H1/TAS2R50/OR1F1/TAS2R40/TAS2R46/OR52B6/OR9A2/TAS2R30/TAS2R13/CA6	26	-5.09902
BP	GO:0035270	endocrine system development	11/513	127/18670	0.000764887	0.0654743	0.0612088	ASCL1/GHRH/APOA1/CRHR1/LHX3/ADCYAP1/FOXA2/NKX2-1/POU3F2/PDX1/SIX3	11	-1.50756
KEGG	hsa05034	Alcoholism	13/223	187/8076	0.00197109	0.066454	0.0649127	GRIN2B/SHC4/H4C2/H2BC14/H2BC10/DDC/H4C1/H2AC12/H4C3/H3C11/H2BC3/H4C6/H4C13	13	-3.60555
BP	GO:0051291	protein heterooligomerization	11/513	128/18670	0.000816569	0.0669833	0.0626196	KRT1/GRIN2B/H4C2/GLRA1/H4C1/H4C3/H3C11/SEMG2/H4C6/H4C13/SEMG1	11	-2.7136
BP	GO:0009953	dorsal/ventral pattern formation	9/513	90/18670	0.000817294	0.0669833	0.0626196	ASCL1/EN1/LHX3/NKX2-1/SFRP1/SOSTDC1/PAX7/SIX3/RFX4	9	-2.33333
CC	GO:0099056	integral component of presynaptic membrane	7/542	73/19717	0.00388431	0.067055	0.0602907	ADCY8/NRXN1/KCNA2/GLRA1/OPRK1/CHRM3/GABRA5	7	-2.64575
CC	GO:0032993	protein-DNA complex	13/542	202/19717	0.00400287	0.067055	0.0602907	IRF4/ST18/H4C2/H2BC14/H2BC10/H4C1/H2AC12/H4C3/H3C11/H2BC3/H4C6/H4C13/H1-1	13	-3.60555
CC	GO:0099060	integral component of postsynaptic specialization membrane	7/542	74/19717	0.00419094	0.067055	0.0602907	CHRNA9/CHRND/EPHA7/GLRA1/CHRM3/LRRTM3/GABRA5	7	-1.88982
BP	GO:0042742	defense response to bacterium	20/513	330/18670	0.000853434	0.0684881	0.0640263	AZU1/PGLYRP2/CST11/LCN2/KLK7/CCL20/H2BC10/LPO/AICDA/DMBT1/HTN1/BPI/DEFB108B/SEMG2/CHGA/NR1H4/SEMG1/DCD/LACRT/LALBA	20	-3.1305
CC	GO:0042627	chylomicron	3/542	13/19717	0.00480929	0.0730974	0.0657235	APOC3/APOA1/APOH	3	1.73205
CC	GO:0099055	integral component of postsynaptic membrane	9/542	117/19717	0.00502021	0.0730974	0.0657235	CHRNA9/CACNG5/CHRND/EPHA7/GLRA1/OPRK1/CHRM3/LRRTM3/GABRA5	9	-2.33333
CC	GO:0098948	intrinsic component of postsynaptic specialization membrane	7/542	77/19717	0.00522124	0.0730974	0.0657235	CHRNA9/CHRND/EPHA7/GLRA1/CHRM3/LRRTM3/GABRA5	7	-1.88982
BP	GO:0021983	pituitary gland development	6/513	42/18670	0.00094629	0.07439	0.0695437	GHRH/LHX3/ADCYAP1/NKX2-1/POU3F2/SIX3	6	-1.63299
BP	GO:0010466	negative regulation of peptidase activity	17/513	262/18670	0.000976521	0.0752312	0.0703301	CST9/CST9L/CST11/WFDC10A/WFDC10B/WFDC8/SERPIND1/SERPINB11/HMSD/PI3/SERPINB12/SERPINB7/PZP/A2ML1/SMR3A/SMR3B/CSN2	17	-1.69775
MF	GO:0015085	calcium ion transmembrane transporter activity	10/504	139/17697	0.00649043	0.0778851	0.0697382	CHRNA9/CACNG6/CACNG1/CACNA1H/GRIN2B/TRPM6/CACNG5/ATP2B3/TRPM8/TRPC5	10	-0.632456
BP	GO:0042476	odontogenesis	11/513	132/18670	0.00105314	0.0781004	0.0730124	FGF4/AMTN/FOXC1/RSPO2/EDAR/MMP20/ODAM/SOSTDC1/AQP5/DSPP/AMELX	11	-2.7136
BP	GO:0046461	neutral lipid catabolic process	6/513	43/18670	0.00107459	0.0781004	0.0730124	APOC3/PLIN5/APOA1/FABP12/FGF21/FABP7	6	0
BP	GO:0046464	acylglycerol catabolic process	6/513	43/18670	0.00107459	0.0781004	0.0730124	APOC3/PLIN5/APOA1/FABP12/FGF21/FABP7	6	0
MF	GO:0001158	enhancer sequence-specific DNA binding	9/504	119/17697	0.00698869	0.0823112	0.0737014	HOXD13/ZFP42/SOX11/NKX2-1/SPIB/POU4F1/CDX2/SIX3/NR1H4	9	-3
BP	GO:0007188	adenylate cyclase-modulating G protein-coupled receptor signaling pathway	15/513	221/18670	0.00121819	0.0868978	0.0812366	RAMP1/GHRH/GPR37L1/ADCY8/LGR5/CRHR1/CXCL10/ADGRG2/PTGFR/ADCYAP1/PSAPL1/OPRK1/CHRM3/ADGRG7/CHGA	15	-2.32379
CC	GO:0098936	intrinsic component of postsynaptic membrane	9/542	122/19717	0.00657863	0.0884168	0.0794976	CHRNA9/CACNG5/CHRND/EPHA7/GLRA1/OPRK1/CHRM3/LRRTM3/GABRA5	9	-2.33333
BP	GO:0060192	negative regulation of lipase activity	4/513	18/18670	0.00126868	0.0888537	0.0830651	APOC3/PLIN5/APOA1/ANGPTL3	4	1
CC	GO:0016324	apical plasma membrane	17/542	318/19717	0.00720799	0.0914131	0.0821916	CYP4F2/S100G/SLC4A10/ADCY8/SLC9A4/SLC17A4/TRPM6/ADGRG2/ENPP3/SLC2A2/RHCG/LCT/AQP5/SLC12A1/PLET1/SLC26A9/DSG1	17	-2.66789
CC	GO:0098889	intrinsic component of presynaptic membrane	7/542	82/19717	0.0073457	0.0914131	0.0821916	ADCY8/NRXN1/KCNA2/GLRA1/OPRK1/CHRM3/GABRA5	7	-2.64575
MF	GO:0004089	carbonate dehydratase activity	3/504	15/17697	0.00809302	0.0919136	0.0822993	CA1/CA10/CA6	3	-1.73205
MF	GO:0008020	G protein-coupled photoreceptor activity	3/504	15/17697	0.00809302	0.0919136	0.0822993	OPN5/RGR/GPR52	3	-1.73205
BP	GO:0031424	keratinization	15/513	224/18670	0.00139329	0.0958385	0.0895948	KRT13/KRT1/KRT37/KRT31/KRT35/KRT32/KRTAP3-3/KRTAP4-1/KRTAP10-4/KRT33A/DSG3/LCE3D/PI3/KRT79/DSG1	15	1.29099
MF	GO:0005262	calcium channel activity	9/504	123/17697	0.00861367	0.0961104	0.0860571	CHRNA9/CACNG6/CACNG1/CACNA1H/GRIN2B/TRPM6/CACNG5/TRPM8/TRPC5	9	-0.333333
CC	GO:0034703	cation channel complex	13/542	220/19717	0.00806632	0.0967959	0.0870314	KCNF1/CACNG6/CACNG1/CACNA1H/GRIN2B/KCNS1/CACNG5/KCNJ16/KCNA2/KCNV1/TRPC5/UNC80/OLFM3	13	-1.38675
